# Supplementary material
Source: Research Square preprint supplement (doi:10.21203/rs.3.rs-9741630/v1)
Supplement: Supplementary file 1 [file 62587514385c1cdded2bbec3.docx]

**Supplementary Figures**

**Figure S1**


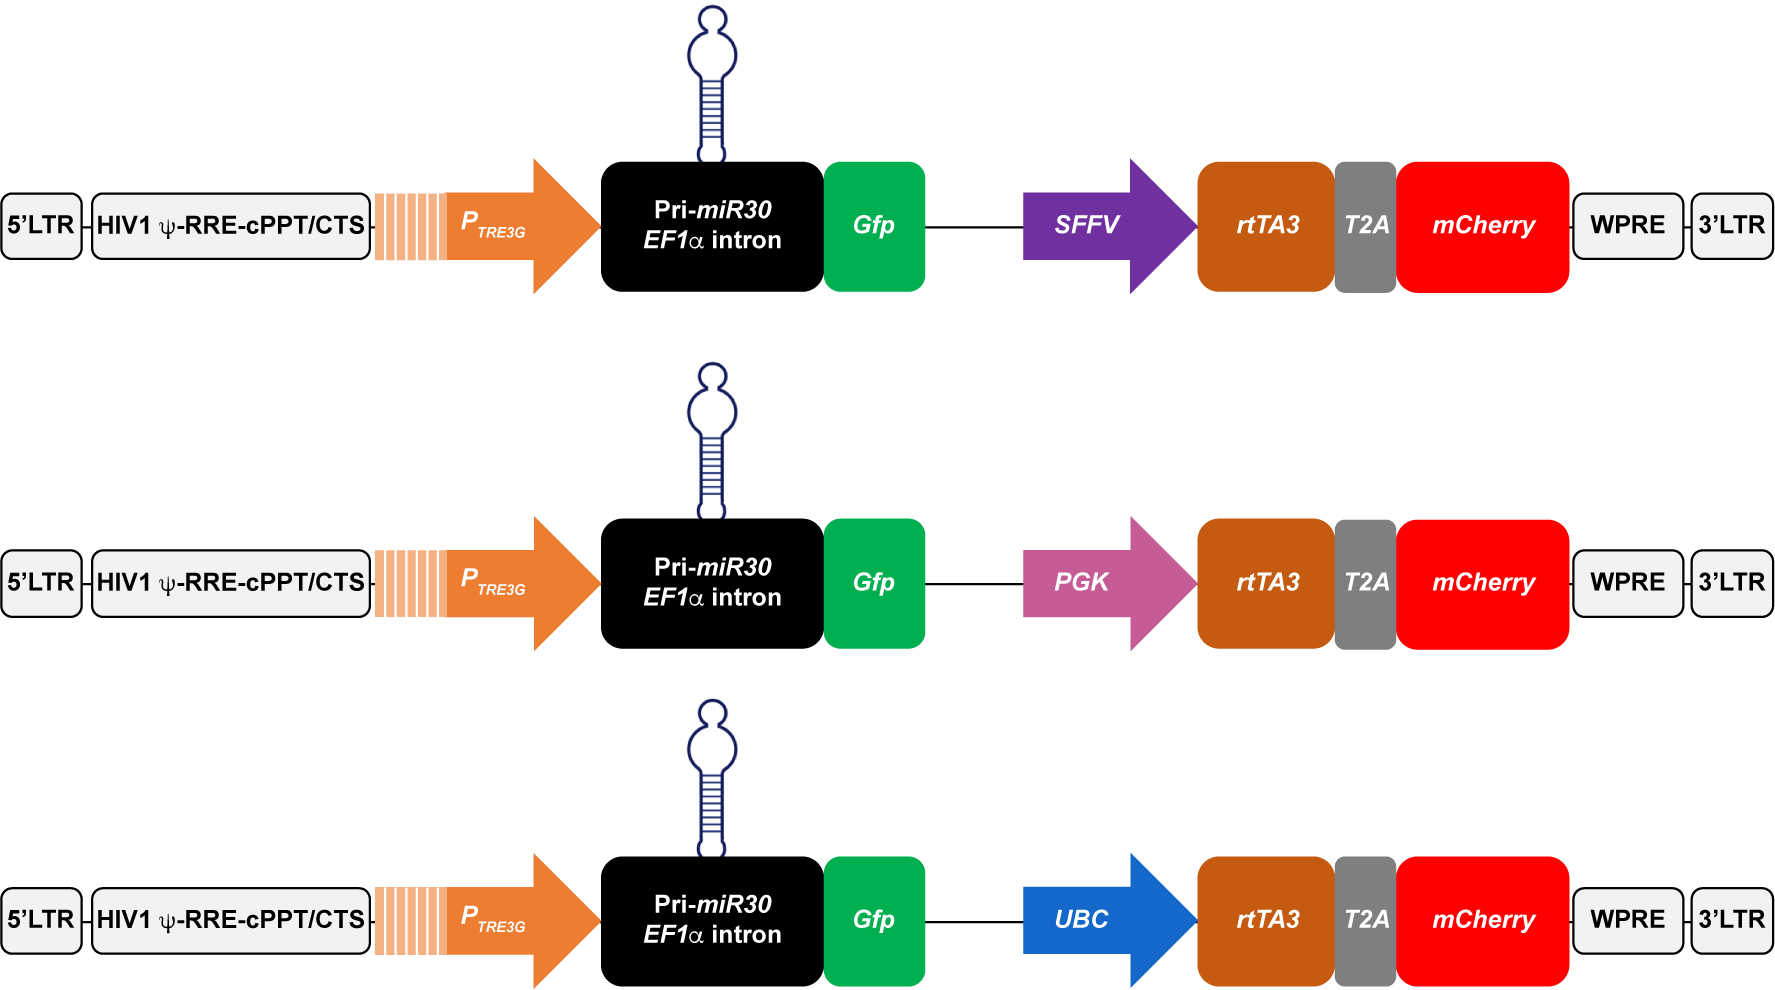


Schematic representation of the new Tet-On miR30-based shRNA lentiviral vectors. pLV.*PTRE3G*-*miR30*sh*RNA*-*Gfp*-*SFFV*-*rtTA*3-*mCherry* (top; hereafter sh*RNA*-*SFFV*), pLV.*PTRE3G*-*miR30*sh*RNA*-*Gfp*-*PGK*-*rtTA3*-*mCherry* (middle; hereafter sh*RNA*-*PGK*) and pLV.*PTRE3G*-*miR30*sh*RNA*-*Gfp*-*UBC*-*rtTA3*-*mCherry* (bottom; hereafter sh*RNA*-*UBC*).

**Figure S2**


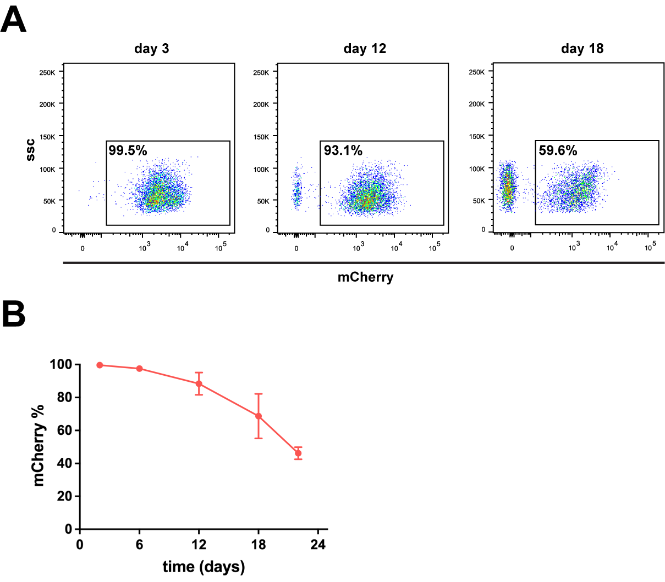


Loss of mCherry expression in K562 cells transduced with the inducible miR30-based sh*Luc*-*SFFV* vector. (A) Representative FCM dotplots showing the percentage of mCherry+ cells at indicated time points in culture. (B) Percentage of mCherry+ cells throughout time in culture (n=3). Error bars shown represent S.D.

**Figure S3**


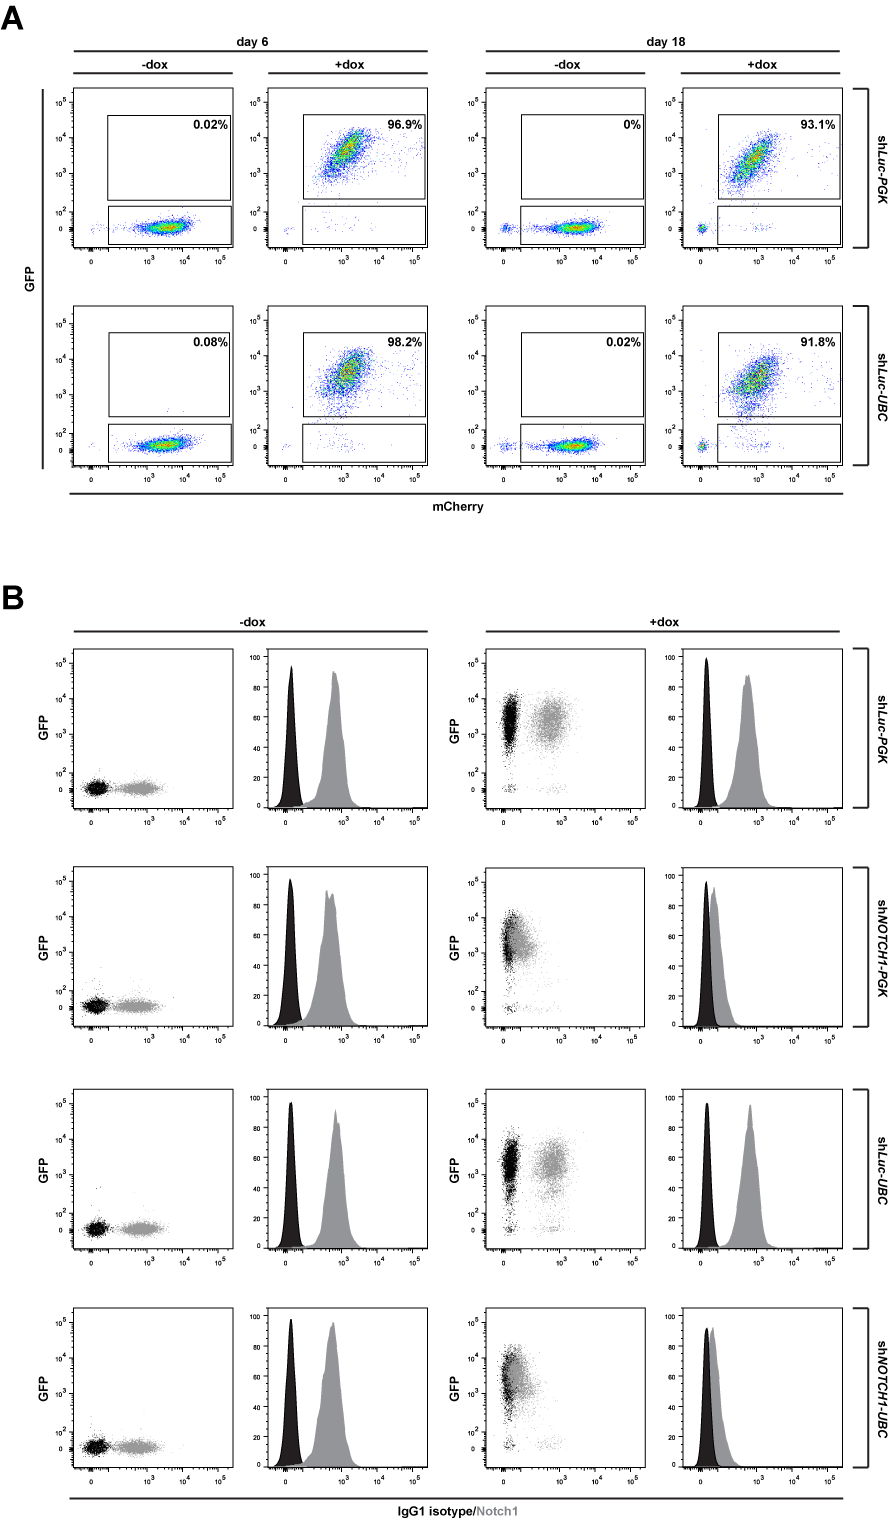


**Stability, inducibility and functionality of the miR30-based sh*RNA*-*PGK* and sh*RNA*-*UBC* lentiviral vectors.** (**A**) Representative FCM dotplots of K562 cells transduced with sh*Luc*-*PGK* or sh*Luc*-*UBC* showing the percentage of mCherry+ and GFP+ cells in the absence or presence of dox after 6 and 18 days of culture. (**B**) Representative FCM dotplots and histograms of K562 cells transduced with the indicated lentiviral vectors showing extracellular Notch1 receptor expression after 18 days of culture in the absence or presence of dox. Cells were stained either with an anti-Notch1 (grey) or an isotype control (black) antibody.

**Figure S4**


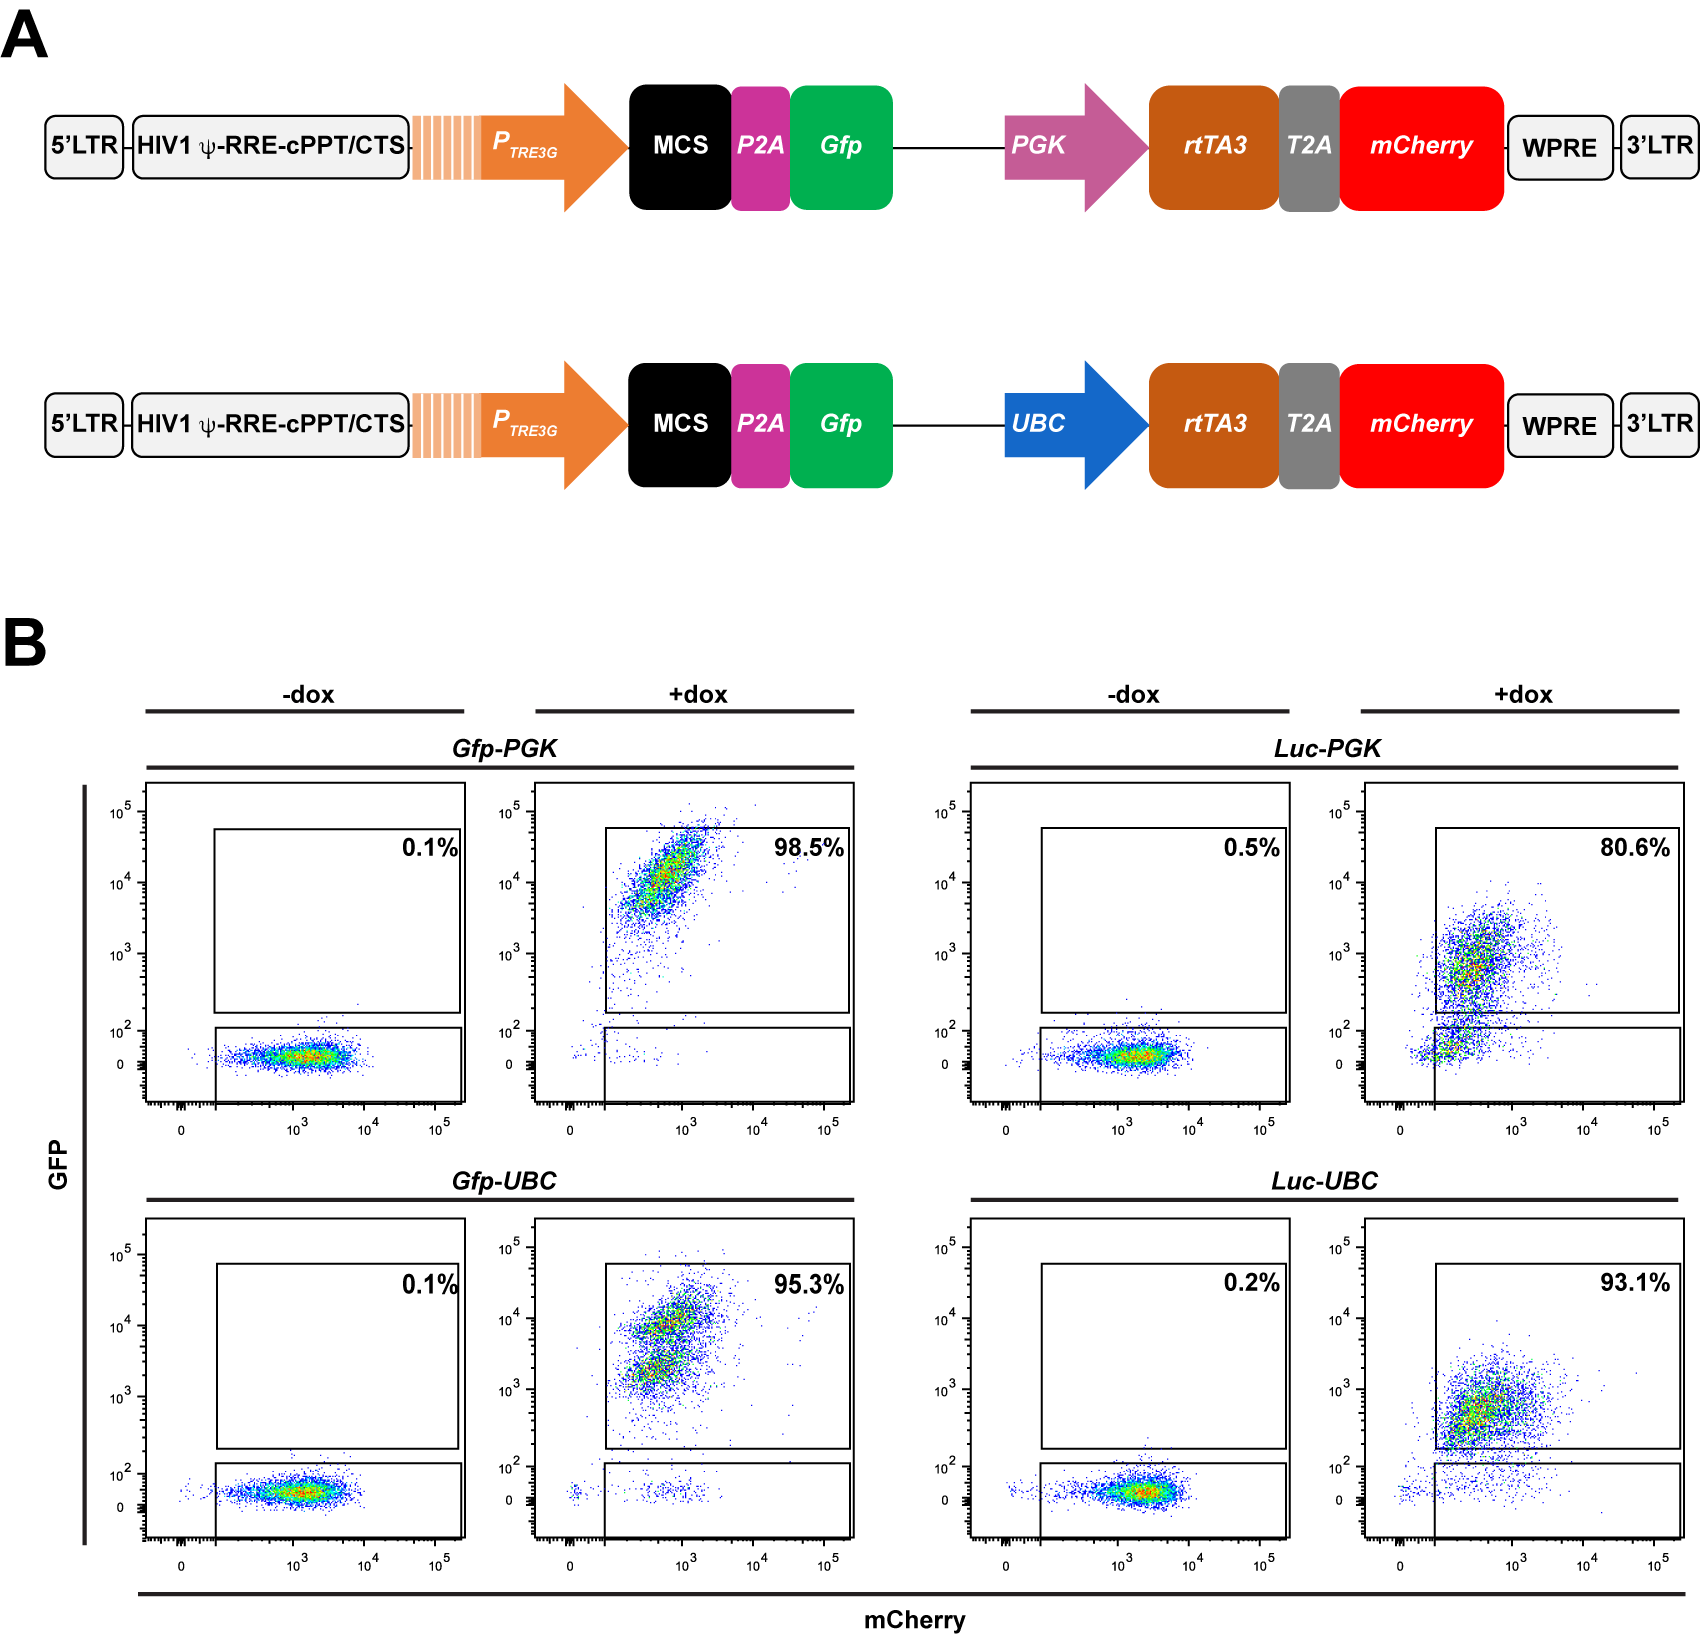


**Stability and inducibility of the pLV.*PTRE3G*-*Gfp-* or *Luc-Gfp*-*PGK*-*rtTA*3-*mCherry* and pLV.*PTRE3G*-*Gfp-* or *Luc-Gfp*-*UBC*-*rtTA*3-*mCherry* lentiviral vectors.** (**A**) Schematic representation of the new Tet-On overexpression lentiviral vectors. (**B**) Representative FCM dotplots of OCI-AML3 cells transduced with the indicated lentiviral vectors showing the percentage of mCherry+ and GFP+ cells in the absence or presence of dox after 18 days of culture.

**Supplementary Materials and Methods**

**Table S1**

| **sh*RNA*** |  | **Sequence** | **Source** |
| --- | --- | --- | --- |
| sh*Luc* | Fwd | 5’pho- TCGAGAAGGTATATTGCTGTTGACAGTGAGCG**C**TACGCTGAGTACTTCGAAATGTAGTGAAGCCACAGATGTACATTTCGAAGTACTCAGCGTA**A**TGCCTACTGCCTCGG -3’ | In-house design |
| Rev | 5’pho- AATTCCGAGGCAGTAGGCATTACGCTGAGTACTTCGAAATGTACATCTGTGGCTTCACTACATTTCGAAGTACTCAGCGTAGCGCTCACTGTCAACAGCAATATACCTTC -3’ |
| *shNOTCH1* | Fwd | 5’pho- TCGAGAAGGTATATTGCTGTTGACAGTGAGCG**A**GGGGCTAACAAAGATATGCAGTAGTGAAGCCACAGATGTACTGCATATCTTTGTTAGCCCC**G**TGCCTACTGCCTCGG -3’ | [1] |
| Rev | 5’pho- AATTCCGAGGCAGTAGGCACGGGGCTAACAAAGATATGCAGTACATCTGTGGCTTCACTACTGCATATCTTTGTTAGCCCCTCGCTCACTGTCAACAGCAATATACCTTC -3’ |

**Forward and reverse *miR30*sh*RNA* oligos for cloning into the *miR30* backbone.** Sense and anti-sense sequences are identified in red and blue, respectively and the loop sequence in green. The original sh*RNA* sequence is underlined, and mismatched nucleotides are in bold. sh*RNA* targeting *Luciferase* (*Luc*) was used as non-target control and one sequence targeting *NOTCH1* (*NOTCH1*) was used to determine the knockdown efficiency of the developed vectors.

[1] Zhu MS, Xu LB, Zeng H, Shi XD, Wu WR, Liu C. Association of Notch1 with vasculogenic mimicry in human hepatocellular carcinoma cell lines. Int J Clin Exp Pathol. 2014;7(9):5782-91.

**Table S2**

| **sh*RNA*** |  | **Sequence** | **Source** |
| --- | --- | --- | --- |
| *E*sh*Luc* | Fwd | 5’pho- TCGAGAAGGTATATTGCTGTTGACAGTGAGCG**C**TACGCTGAGTACTTCGAAATGTAGTGAAGCCACAGATGTACATTTCGAAGTACTCAGCGTA**A**TGCCTACTGCCTCGGACTTCAAGGGGCTAG-3’ | In-house design |
| Rev | 5’pho- AATTCTAGCCCCTTGAAGTCCGAGGCAGTAGGCA**T**TACGCTGAGTACTTCGAAATGTACATCTGTGGCTTCACTACATTTCGAAGTACTCAGCGTA**G**CGCTCACTGTCAACAGCAATATACCTTC-3’ |
| *E*sh*NOTCH1* | Fwd | 5’pho- TCGAGAAGGTATATTGCTGTTGACAGTGAGCG**A**GGGGCTAACAAAGATATGCAGTAGTGAAGCCACAGATGTACTGCATATCTTTGTTAGCCCC**G**TGCCTACTGCCTCGGACTTCAAGGGGCTAG-3’ | [10] |
| Rev | 5’pho- AATTCTAGCCCCTTGAAGTCCGAGGCAGTAGGCA**C**GGGGCTAACAAAGATATGCAGTACATCTGTGGCTTCACTACTGCATATCTTTGTTAGCCCC**T**CGCTCACTGTCAACAGCAATATACCTTC-3’ |
| Esh*NOTCH1-2* | Fwd | 5’pho- TCGAGAAGGTATATTGCTGTTGACAGTGAGCG**A**CAGGTGCAGCCACAAAACTTATAGTGAAGCCACAGATGTATAAGTTTTGTGGCTGCACCTG**C**TGCCTACTGCCTCGGACTTCAAGGGGCTAG-3’ | Dharmacon™ pGIPZ |
| Rev | 5’pho- AATTCTAGCCCCTTGAAGTCCGAGGCAGTAGGCAGCAGGTGCAGCCACAAAACTTATACATCTGTGGCTTCACTATAAGTTTTGTGGCTGCACCTGTCGCTCACTGTCAACAGCAATATACCTTC-3’ |

**Forward and reverse *miR30*-*EshRNA* oligos for cloning into the *miR30*-*E* backbone.** Sense and anti-sense sequences are identified in red and blue, respectively and the loop sequence in green. The original shRNA sequence is underlined and mismatched nucleotides are bolded. sh*RNA* targeting *Luciferase* (*E*sh*Luc*) was used as non-target control and two sequences targeting *NOTCH1* (*E*sh*NOTCH1* and *E*sh*NOTCH1-2*) were used to determine the knockdown efficiency of the developed vectors with the improved *miR30*-*E* backbone.
